1  
2  
3  
4  
5  
6  
7  
8  
9  
10  
11  
12  
13  
14  
15  
16  
17

**Title**

ethoscopy & ethoscope-lab: a framework for behavioural analysis  
to lower entrance barrier and aid reproducibility

**Authors and affiliations**

Laurence Blackhurst<sup>1#</sup> and Giorgio F. Gilestro<sup>1#</sup>

*# To whom correspondence should be addressed.*

*E-mail: [l.blackhurst19@imperial.ac.uk](mailto:l.blackhurst19@imperial.ac.uk), [giorgio@gilest.ro](mailto:giorgio@gilest.ro)*

<sup>1</sup>Department of Life Sciences, Imperial College London, London, UK

## 18 **Abstract**

## 19 **Summary**

20 High-throughput analysis of behaviour is a pivotal instrument in modern neuroscience, allowing  
21 researchers to combine modern genetics breakthrough to unbiased, objective, reproducible  
22 experimental approaches. To this extent, we recently created an open-source hardware platform  
23 (ethoscope<sup>1</sup>) that allows for inexpensive, accessible, high-throughput analysis of behaviour in  
24 *Drosophila* or other animal models. Here we equip ethoscopes with a Python framework for data  
25 analysis, ethoscopy, designed to be a user-friendly yet powerful platform, meeting the requirements of  
26 researchers with limited coding expertise as well as experienced datascientists. Ethoscopy is best  
27 consumed in a prebaked Jupyter-based docker container, ethoscope-lab, to improve accessibility and to  
28 encourage the use of notebooks as a natural platform to share post-publication data analysis.

## 29 **Availability and implementation**

30 Ethoscopy is a Python package available on GitHub and PyPi. Ethoscope-lab is a docker container  
31 available on DockerHub. A landing page aggregating all the code and documentation is available at  
32 <https://lab.gilest.ro/ethoscopy>.

33

## 34 **Introduction**

35 The use of open-source software in science is commended by researchers and funders alike, for it frees  
36 academic science from ties with possibly ephemeral third-parties; it creates a bottom-up environment in  
37 which researchers actively collaborate to build their own solutions based on their own demands; it  
38 maximises the value of public funding; it provides the transparency that is essential for reproducibility.  
39 At the same time, however, academic open-source software still encounters barriers in terms of ease of  
40 use, compatibility with multiple operating systems and constantly evolving software ecosystems, as  
41 well as often unmet good practices in post-publication data sharing. We recently created an open-  
42 source, well documented platform for high-throughput behavioural analysis in *Drosophila* that has been  
43 widely adopted by the community (ethoscope<sup>1</sup>, <https://lab.gilest.ro/ethoscope>) and we initially equipped  
44 it with a powerful and versatile selection of R packages (rethomics<sup>2</sup>). However, while R remains a  
45 language of first-choice for data scientists, its structure, syntax and philosophy can prove unwelcoming

46 to newcomers and ultimately discourage adoption in the field. Here we describe ethoscropy and  
47 ethoscope-lab, two instruments whose genesis was motivated by our very experience in the past years.  
48 These tools are not simply the porting of rethomics into a more accessible programming language: in  
49 fact, they offer new functions and tools, integrating with the modern sleep and circadian literature and  
50 at the same time adopt the best practice in code accessibility and data sharing. Here below we detail  
51 how.

## 52 **Improved accessibility for the community at large**

53 Software accessibility is a key aspect of bioinformatics, as even the best tools are useless if they are not  
54 adopted by the community. One way to improve accessibility is for authors to distribute Docker  
55 containers<sup>3,4</sup>. Docker containers increase adoption because they guarantee the tool will always ship  
56 with the needed dependencies; they are truly multiplatform as they offer the same experience to any  
57 user irrespective of their operating system; they guarantee that all researchers will operate on the same  
58 version of code and underlying libraries, ultimately increasing reproducibility. Ethoscope-lab is a  
59 docker container distributed via the official DockerHub platform and providing at any time access to  
60 the latest versions of ethoscropy and rethomics in a Jupyter instance.

## 61 **Improved accessibility for users within the laboratory**

62 Ethoscope-lab ships with a stable release of JupyterHub, the multiuser web-based notebook that rapidly  
63 became the tool of choice for most data scientists<sup>5</sup>. The typical scenario will be for a laboratory to  
64 deploy ethoscope-lab on a shared powerful workstation, accessible to all laboratory members via the  
65 intranet or the internet. Ideally, the same workstation will also store the raw data of the behavioural  
66 analysis, as extracted directly by the ethoscopes, so that ethoscropy can have local, read-only access to  
67 them. Users will connect to Jupyter-hub using their favourite web-browser on a computer or tablet,  
68 login using their own credentials, and work in the cloud, saving their notebooks, stats and figures on a  
69 remote folder on the workstation that can be backup-ed up and shared backed with themselves or other  
70 users (for instance, via Samba or the open source software Owncloud). This scenario offers multiple  
71 advantages: all the users in the laboratory access ethoscropy as a SaaS (Software as a Service) which is  
72 the best way to improve accessibility to end users; the docker container and the workstation can be  
73 setup and maintained by one tech-savvy user or by the IT department, allowing all other end users to  
74 concentrate on the data analysis, not the tool maintenance; the only machine requiring powerful

75 computing specifications will be the workstation hosting the docker container so that users will be able  
76 to perform big-data analysis from any device and any location, saving time and resources.

### 77 **Good practice in post-publication data sharing**

78 At the time of publication, researchers will share information on which version of the docker container  
79 they used for their analysis and upload fully annotated Jupyter notebooks as supplementary data. We  
80 provide several example notebooks that can serve as step-by-step tutorials on the most common  
81 functions of ethoscropy and, at the same time, offer direct evidence of why a Jupyter notebook is  
82 considered the best instrument to share post-publication data processing in research. A reader that has  
83 access to: 1) the raw behavioural data, 2) the metadata describing the experimental conditions, 3) a well  
84 documented Jupyter notebook and 4) the matching version of ethoscopelab, will be able to reproduce  
85 and re-analyse and figure of any publication, with no risk of obsolescence even after decades. All these  
86 can be shared on the journal platform or via third party scholarly services, such as Zenodo.

### 87 **Ethoscropy features**

88 Similarly to rethomics, ethoscropy will work out-of-the-box on ethoscope and DAMs data<sup>6</sup> but can in  
89 principle process any behavioural data as long as they are appropriately formatted. Ethoscropy  
90 capabilities are mostly geared towards animals' activity, with a particular focus on circadian biology  
91 and sleep, including a newly introduced analysis of sleep-depth that uses a hidden Markov model to  
92 identify sleep stages in *Drosophila*<sup>7</sup>. Figures are created using the open-source graphing library plotly<sup>8</sup>.  
93 Plotly output is interactive by default: users can select and zoom-in on smaller windows of data and can  
94 hide or show individual datasets with a click of the mouse, for instance hiding genotypes from a  
95 complex comparison. Ethoscropy has a focus on sleep and circadian analysis and methods for the most  
96 common operations are embedded in the code, so that novice users will be able to perform the most  
97 common analysis of sleep using only a single line of code. However, any bespoke analysis will still be  
98 easy to adopt given that ethoscropy objects build on the Pandas dataframe, so experienced users will  
99 have access to the entire rich toolbox available to all Python datascientists.

### 100 **Proof of principle**

101 As proof of principle of ethoscropy capabilities, we show analyses of sleep (Figure 1a,b) and sleep-  
102 depth (Figure 1c) for a group of wild-type Canton S flies whose activity was recorded with ethoscopes  
103 for several days. Wiggin *et al* first proposed an interesting computational paradigm to identify *bona*

104 *vide* covert sleep stages using Hidden Markov Chains (HMC)<sup>7</sup>. Given that their initial analyses were  
105 mostly based on data collected using *Drosophila* activity monitors (thus offering only limited  
106 resolution of activity<sup>9</sup>), we ought to explore how HMC would perform on activity data collected at  
107 higher resolution, employing ethoscope video tracking. While we found that the initial sleep  
108 characterisation in four hidden sleep stages generally holds true (Figure 1c), we also identified a  
109 potentially interesting difference: using ethoscopes, we could detect deep-sleep not throughout the  
110 night as originally reported<sup>7</sup>, but almost exclusively in the first half of the night, with a clear prominent  
111 peak at ZT15 (Figure 1c). Interestingly, this specific window of time was previously shown to be the  
112 one associated to the highest arousal threshold using an assay of odour perception<sup>10</sup>, nicely matching  
113 ethoscopy's description of sleep stages.

114

## 115 **Conclusions**

116 We built ethoscopy and ethoscope-lab to further improve accessibility and reproducibility in the field of  
117 *Drosophila* sleep. Besides offering state-of-the-art data analysis, we envision these tools will open new  
118 doors to behavioural scientists and introduce them to good sharing practice in terms of code  
119 accessibility and reproducibility.

120

## 121 **Funding and acknowledgements**

122 LB was funded by UKRI with a BBSRC DTP scholarship to Imperial College London (BB/M011178/1  
123 proj 2283755). We thank Esteban Beckwith for providing the circadian data used in one of the Jupyter  
124 tutorials and all members of the Gilestro lab for discussion and useful feedback on ethoscopy and  
125 ethoscope-lab.

126

## 127 **Code and documentation.**

128 Code, documentation, and tutorials are available at <https://lab.gilest.ro/ethoscopy>

129

## 130 **Reference**

1. Geissmann, Q. *et al.* Ethoscopes: An Open Platform For High-Throughput Ethomics. *PLOS Biol.* **15**, e2003026 (2017).
2. Geissmann, Q., Rodriguez, L. G., Beckwith, E. J. & Gilestro, G. F. Rethomics: An R framework to analyse high-throughput behavioural data. *PLOS ONE* **14**, e0209331 (2019).
3. Boettiger, C. An introduction to Docker for reproducible research. *ACM SIGOPS Oper. Syst. Rev.* **49**, 71–79 (2015).
4. Nüst, D. *et al.* Ten simple rules for writing Dockerfiles for reproducible data science. *PLOS Comput. Biol.* **16**, e1008316 (2020).
5. Why Jupyter is data scientists' computational notebook of choice.  
<https://www.nature.com/articles/d41586-018-07196-1>.
6. Rosato, E. & Kyriacou, C. P. Analysis of locomotor activity rhythms in *Drosophila*. *Nat. Protoc.* **1**, 559–568 (2006).
7. Wiggin, T. D. *et al.* Covert sleep-related biological processes are revealed by probabilistic analysis in *Drosophila*. *Proc. Natl. Acad. Sci.* (2020) doi:10.1073/pnas.1917573117.
8. Sievert, C. *Interactive Web-Based Data Visualization with R, plotly, and shiny*. (Chapman and Hall/CRC, 2020). doi:10.1201/9780429447273.
9. Gilestro, G. F. Video tracking and analysis of sleep in *Drosophila melanogaster*. *Nat. Protoc.* **7**, 995–1007 (2012).
10. French, A. S., Geissmann, Q., Beckwith, E. J. & Gilestro, G. F. Sensory processing during sleep in *Drosophila melanogaster*. *Nature* **598**, 479–482 (2021).

132

133 **Figure legend.**

134 **Figure 1 – Ethoscopy analysis of sleep and sleep depth. a)** Overview of sleep and activity using the  
135 heatmap plotting method of ethoscopy. Here we show the overall activity of a group of wild type flies  
136 in control conditions (upper panel) or during a sleep deprivation experiment (lower panel). The blue to  
137 yellow color gradient quantifies activity (blue) and sleep (yellow). **b)** 24h profile of baseline sleep of

137 the control flies shown in b. **c)** Hidden Markov Chains modelling of four covert sleep stages. ZT:  
138 Zeitgeber.

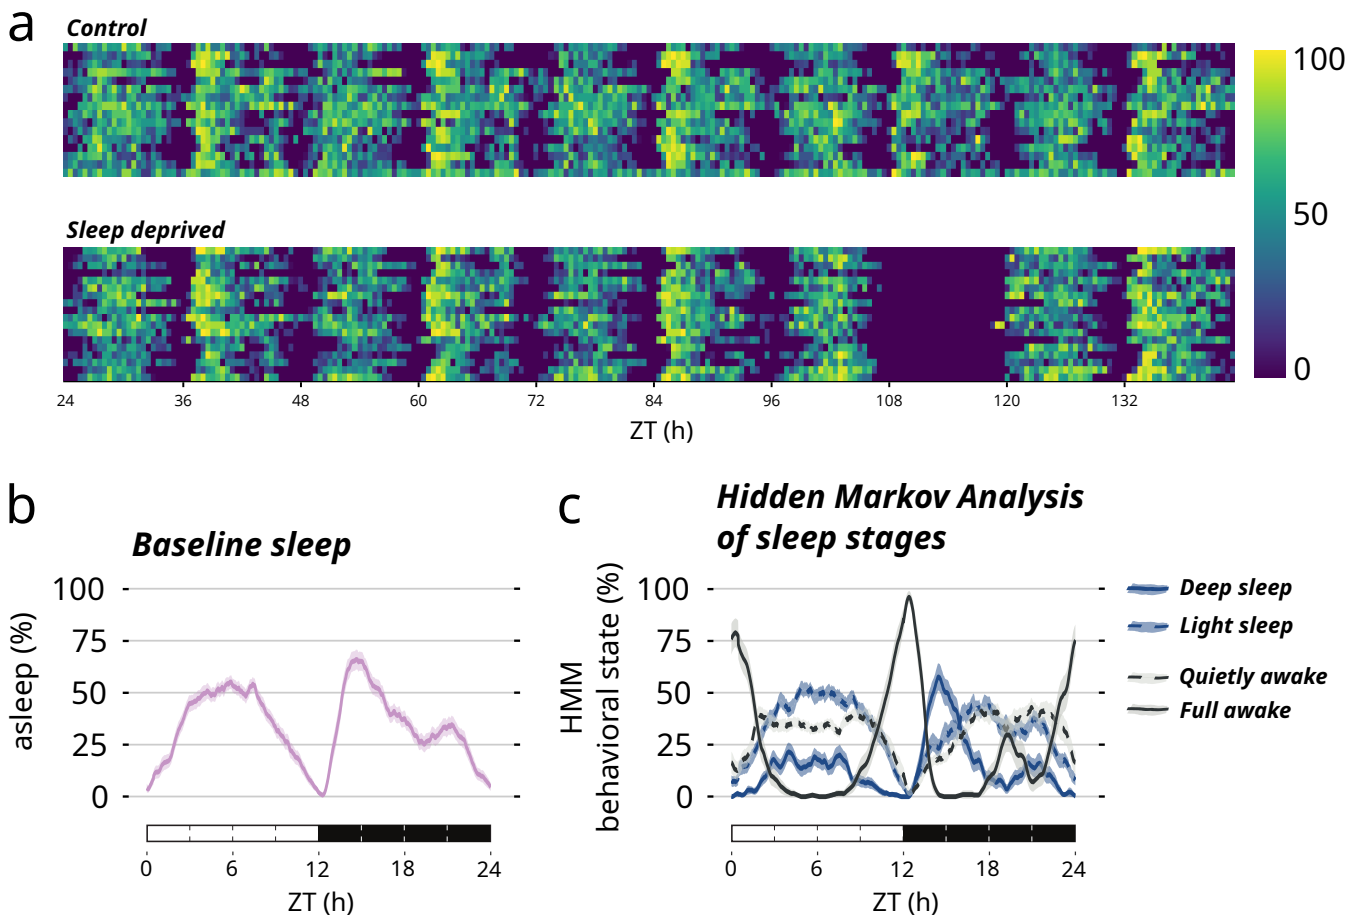

Figure 1  
Blackhurst *et al.* 2022
